# Supplementary material for: Ccn2a/Ctgfa is an injury-induced matricellular factor that promotes cardiac regeneration in zebrafish
Source: Oxford University Press journal article supplement (doi:10.1242/dev.193219), 2020-01-01
Supplement: dev193219supp.pdf [file dev193219supp.pdf]

## Supplementary Information

**Ccn2a/Ctgfa is an injury-induced matricellular factor that promotes cardiac regeneration in zebrafish****Fig. S1**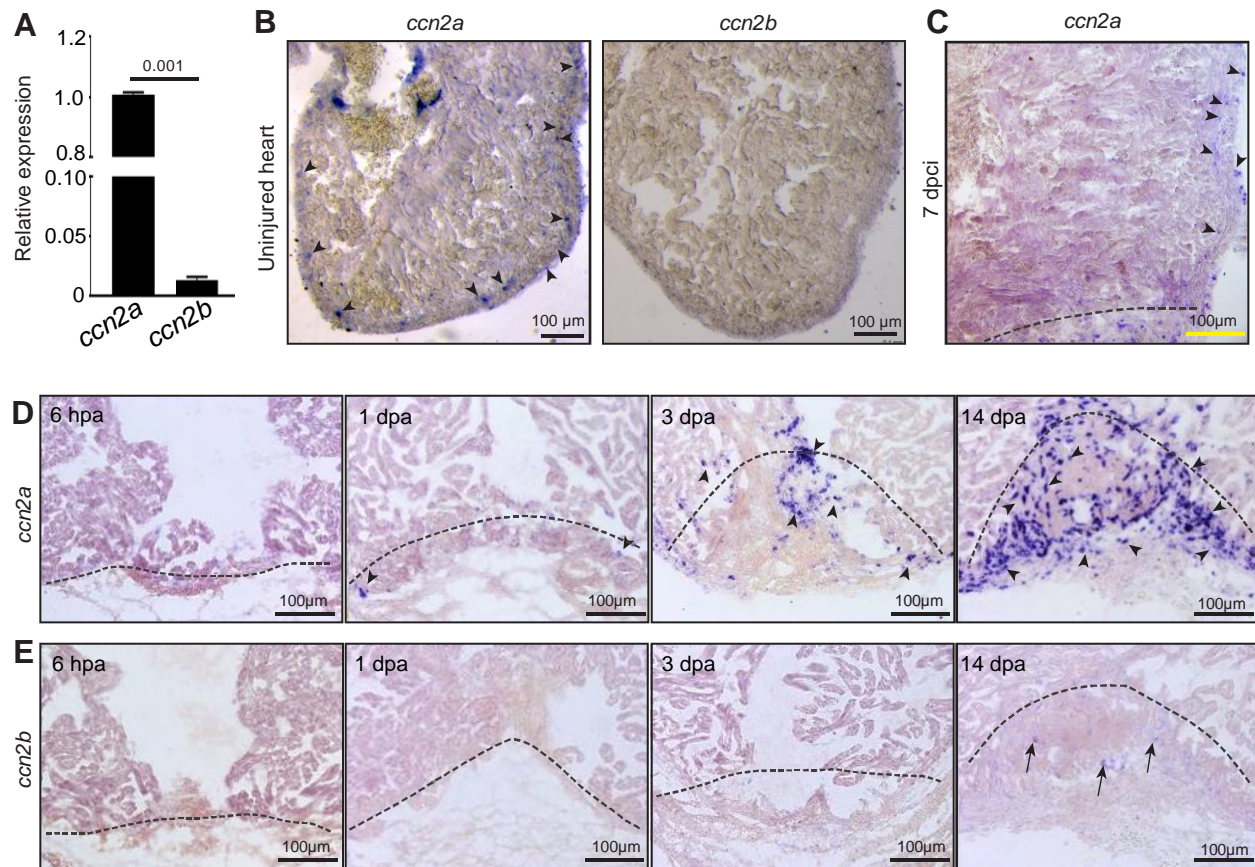

**Fig. S1: *ccn2a* expression is induced upon myocardial injury.** (A) Quantification of *ccn2a* and *ccn2b* expression in 4 dpci hearts (n=3, each sample represents a pool of 6 hearts). Error bars indicate the mean  $\pm$  s.d.. The mean *ccn2a* expression value was set to 1. The statistical significance of differences was evaluated by a two-tailed Student's t-test (GraphPad Prism). Mean Ct values for this figure are provided in Supplementary Table 4. (B) Sections of an uninjured heart showing the expression pattern of *ccn2a* and *ccn2b*. *ccn2a* is expressed in the primordial layer and cortical myocardium (arrowheads). *ccn2b* is not detected in uninjured heart. (C) Sagittal section of a 7 dpci heart showing *ccn2a* is expressed in the primordial layer and cortical myocardium at the remote tissue (arrowheads). Dotted lines mark the injury border. (D) Images showing the time course of *ccn2a* expression in the heart post resection-injury. Expression is induced in the wound as early as 1 dpa (arrowheads), and expression levels are seen to increase through the regenerative stages (arrowheads). (E) Spatio-temporal expression pattern of *ccn2b* in injured heart tissue. Arrows indicate *ccn2b*-expressing cells. hpa: hours post amputation, dpa: days post amputation. Dotted lines mark the wound edge.

**Fig. S2****A BAC: CH211-156I24**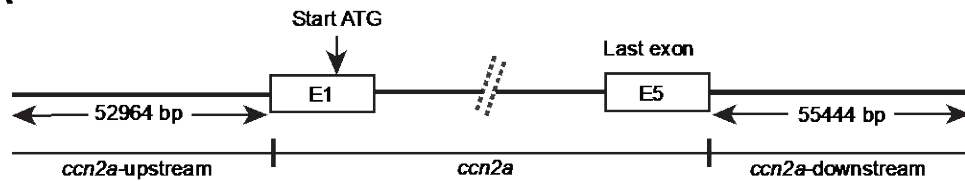**B BAC<sub>ccn2a</sub>:EGFP**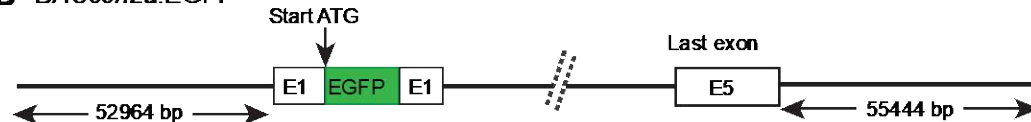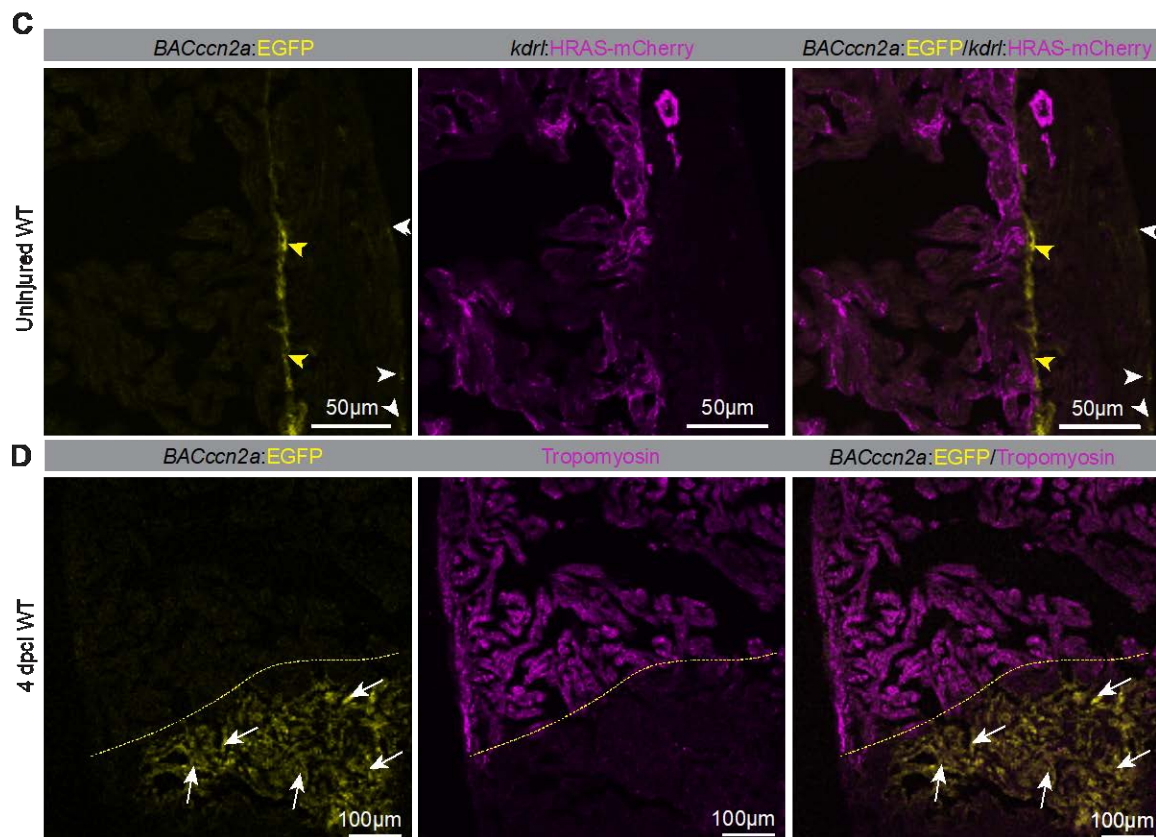

**Fig. S2: *BACccn2a*:EGFP reporter expression is seen in the injured heart tissue.** (A) Schematic representation of a BAC vector used to create *ccn2a* reporter line. (B) Schematic representation of a recombiner BAC vector to generate *BACccn2a*:EGFP transgenic reporter line. The EGFP cassette was sub-cloned at the ATG start site of the *ccn2a* gene in the BAC construct. (C) *BACccn2a*:EGFP expression is seen in the primordial layer (yellow arrowheads), and scattered expression in the cortical myocardium (white arrowheads) is seen in the sagittal section of an uninjured heart. (D) Sagittal section of a 4dpi *BACccn2a*:EGFP expressing (yellow) heart immunostained for Tropomyosin (magenta; marks CMs). Arrows point to EGFP-expressing cells in the wound. CMs (Magenta) are devoid of *BACccn2a*:EGFP expression. Dotted lines mark the injury border.

**Fig. S3**

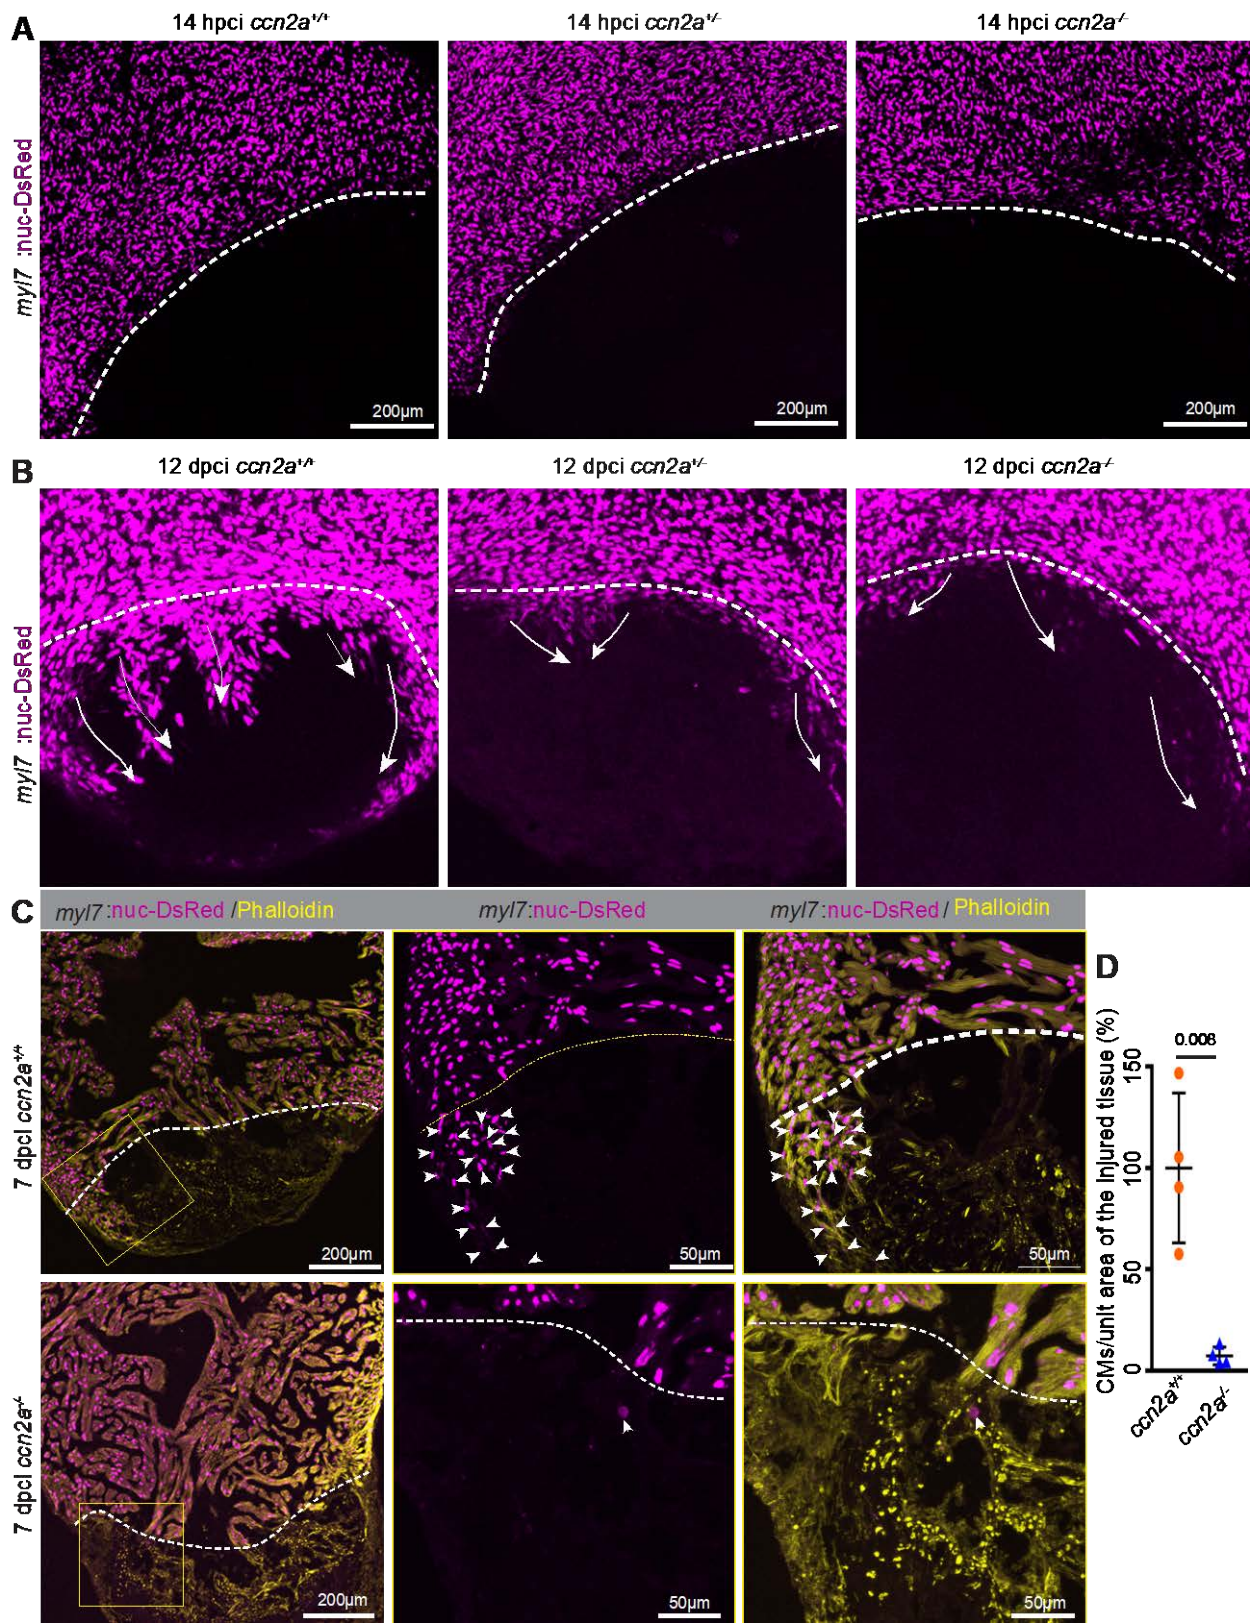

**Fig. S3: CM infiltration into injured cardiac tissue is impaired in *ccn2a*<sup>-/-</sup>.** (A) Maximum intensity projection (MIP) of confocal sections taken of whole-mount heart at 14 hpci (hours post cryoinjury). DsRed<sup>+</sup> CMs are not visible in the injured tissue. (B) MIP of confocal images taken of whole-mount heart at 12 dpci. DsRed (magenta) marking CM nuclei and arrows indicate the direction of CMs infiltration. (C) MIP of confocal images taken of a 10-μm sagittal cryosection of a 7 dpci heart, expressing DsRed in CM nuclei (magenta), and stained with phalloidin (yellow; marks F-actin). Arrowheads indicate CMs in the injured tissue. (D) Quantification of the total number of CMs in the injured cardiac tissue of *ccn2a*<sup>+/+</sup>, and *ccn2a*<sup>-/-</sup> hearts at 7 dpci (n=4 each). At least two sections of each heart were used for quantification. The mean of the wild-type control value was set to 100%. Error bars indicate the mean ± s.d.. A two-tailed Student's t-test evaluated the statistical significance of differences (GraphPad Prism). Dotted lines mark the injury border.

Fig. S4

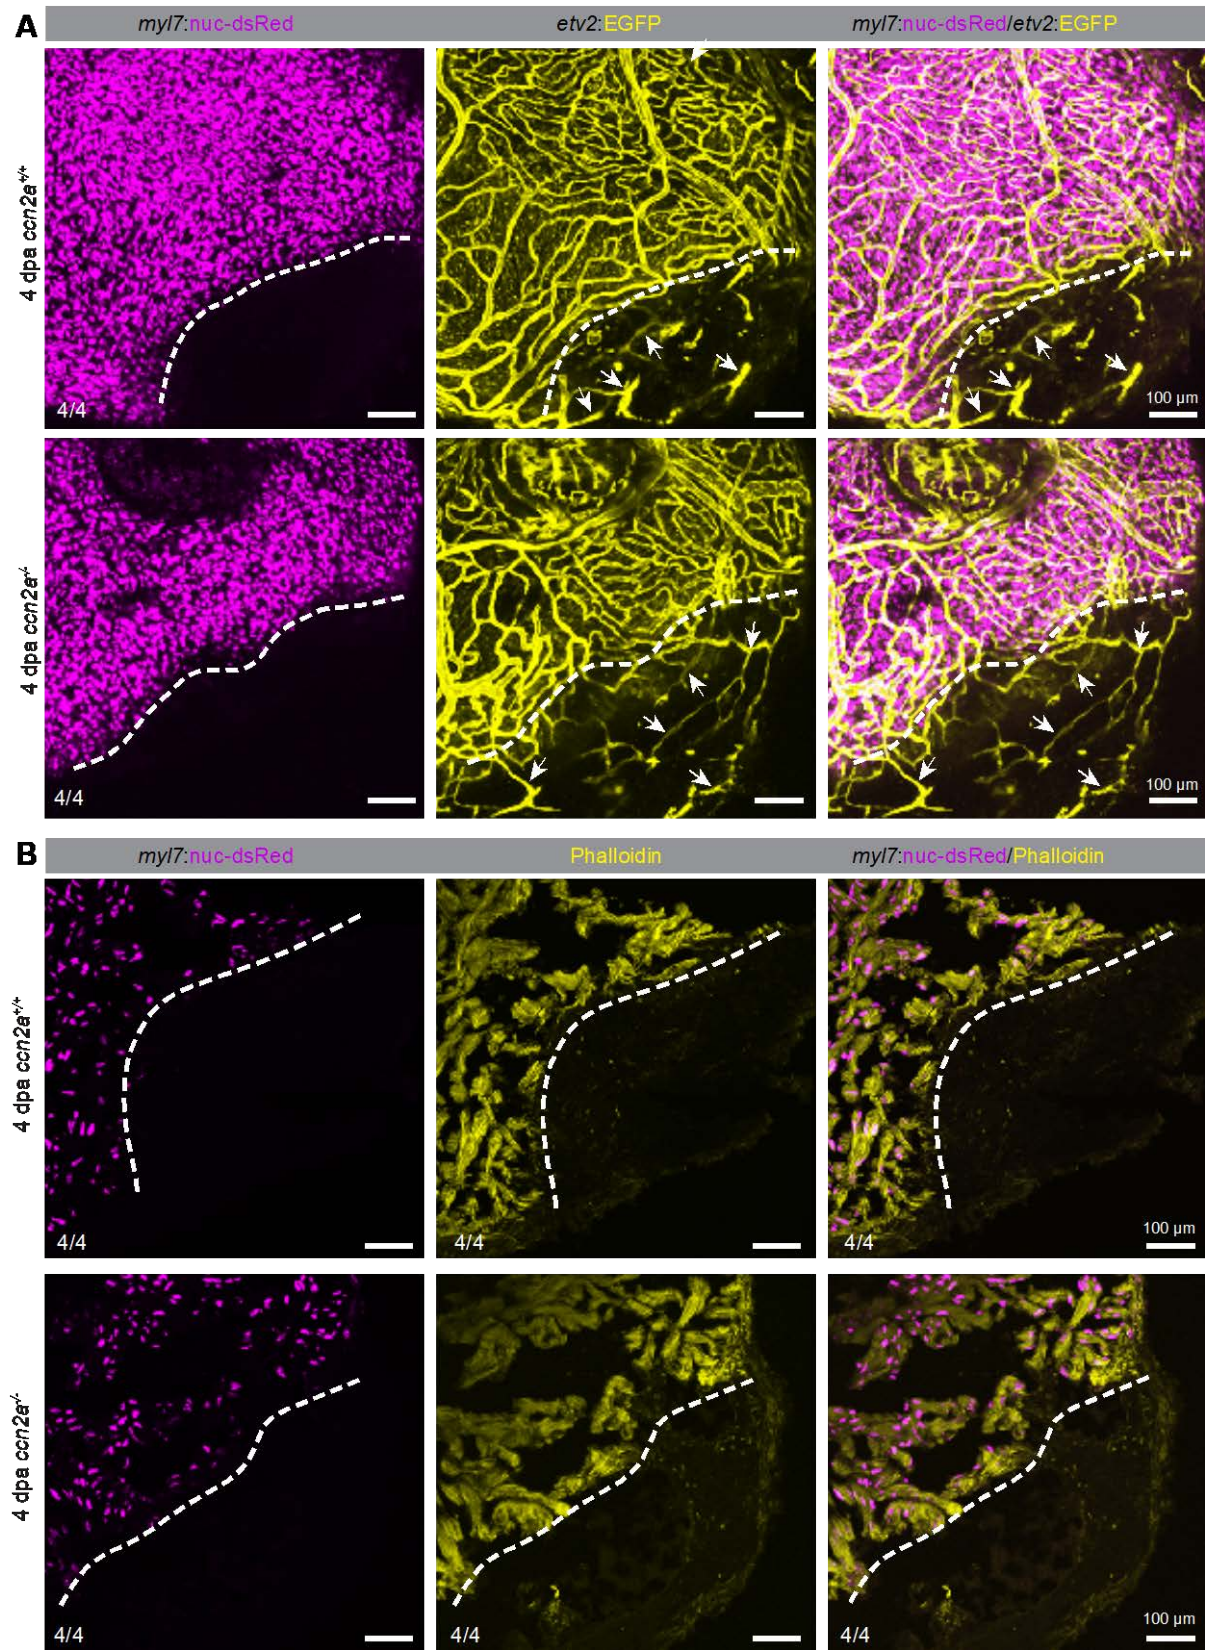

**Fig. S4: CMs are not visible in the cardiac wound at 4 dpa.** (A) MIP of optical sections of freshly isolated whole-mount heart at 4 dpa. DsRed marks CM nuclei (magenta) and EGFP marks coronary vessels (yellow). Arrows point to coronary vessels in the wound. (B) MIP of optical sections of a 10- $\mu$ m ventricular sagittal cryosection stained with phalloidin (yellow; marks F-actin). DsRed marks CM nuclei (magenta). Dotted lines mark injury edge. dpa: days post amputation.

**Fig. S5**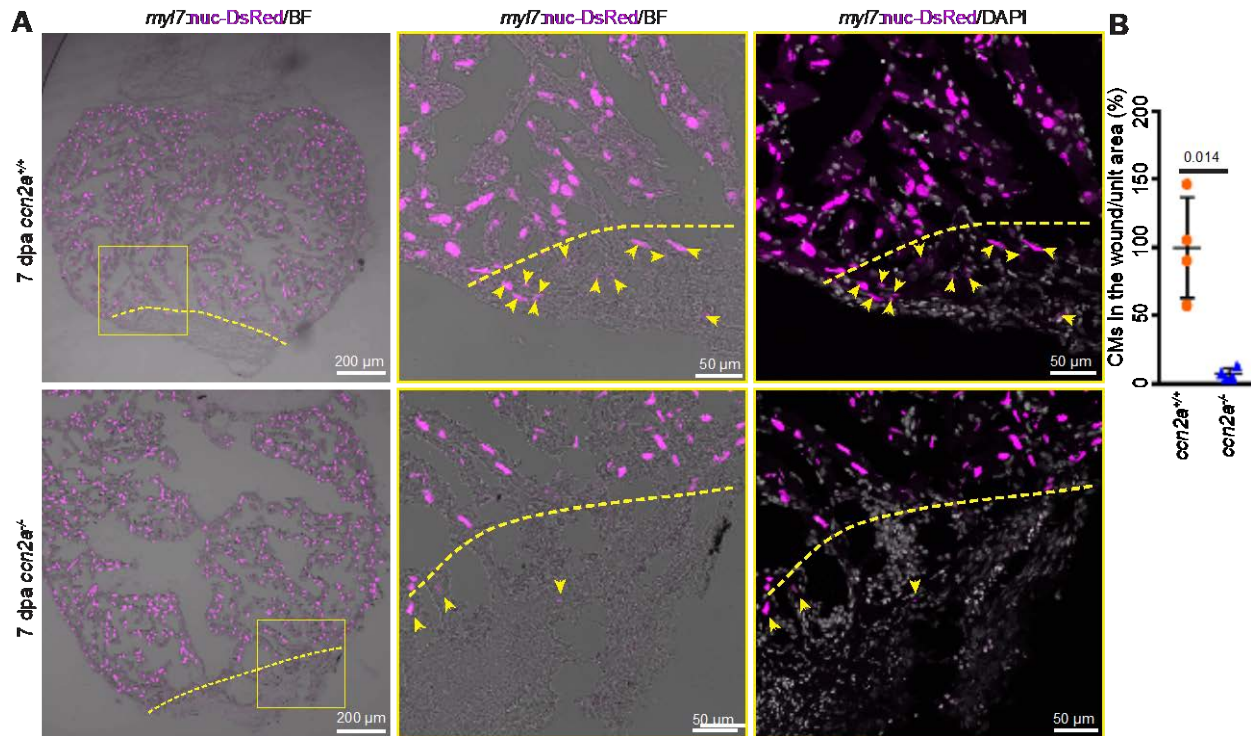

**Fig. S5: Reduced CM infiltration into the apical wound of amputated *ccn2a*<sup>-/-</sup> hearts.** (A) Representative MIP of optical sections of 10-μm thick ventricular sagittal cryosections of a 7 dpa hearts expressing dsRed in the CM nuclei (magenta), stained with DAPI (white; marks all nuclei). Dotted lines mark the wound border and arrowheads indicate CMs in the wound. (B) Quantification of the number of CMs found in the wound tissue in *ccn2a*<sup>+/+</sup>, and *ccn2a*<sup>-/-</sup> hearts at 7 dpa (n=4 each). Two sections of each heart were analyzed for quantification. The mean of the wild-type control value was set to 100%. Error bars indicate the mean ± s.d.. The statistical significance of differences was evaluated by a two-tailed Student's t-test (GraphPad Prism). dpa: days post amputation.

**Fig. S6**

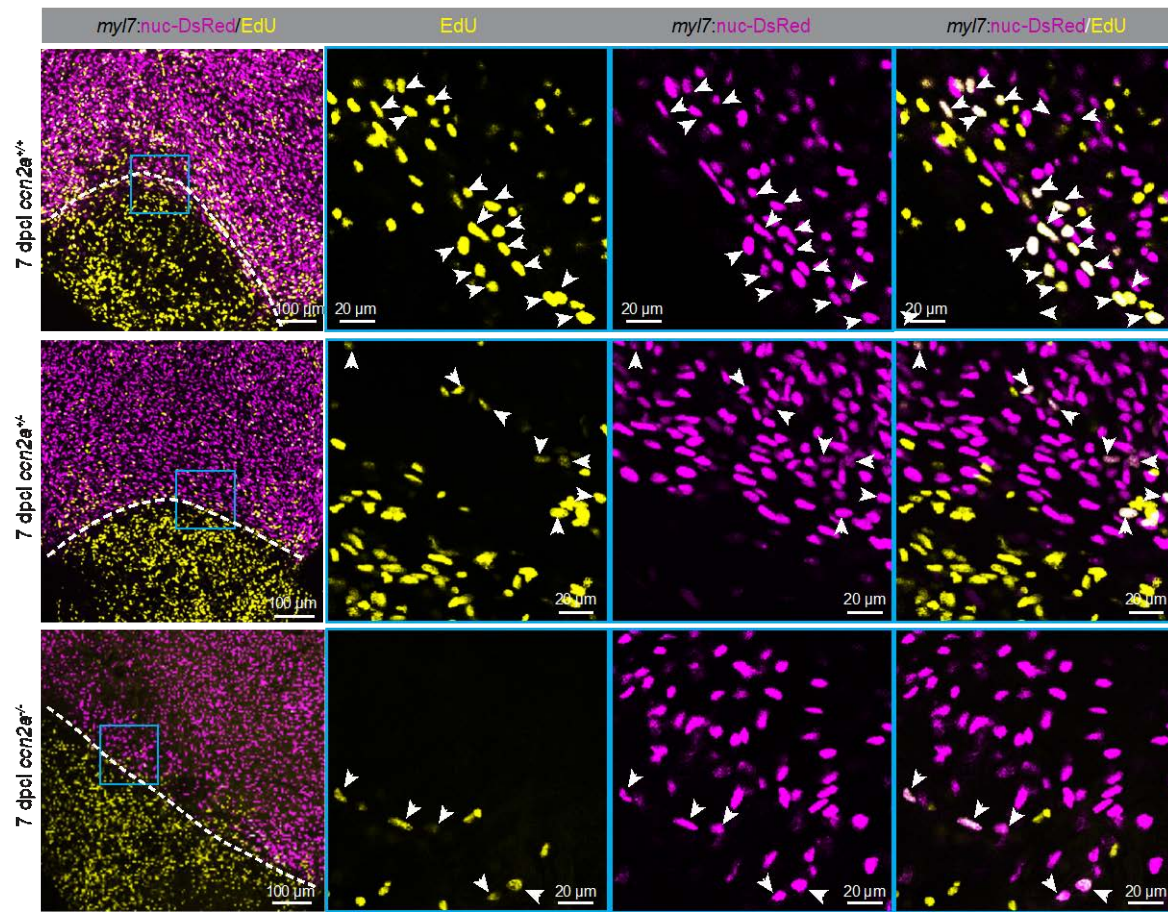

**Fig. S6: *ccn2a* mutants show reduced CM proliferation at 7 dpcl.** (A) Panels in column 1 show maximum intensity projections of confocal images of 7 dpcl whole-mount hearts stained for EdU (yellow; marks proliferating cells). DsRed (magenta) mark CM nuclei. The corresponding high magnification, single-plane optical sections are shown in panels of column 2-4. Arrowheads point to EdU<sup>+</sup>/DsRed<sup>+</sup> cells. Dotted lines mark the injury border.

**Fig. S7**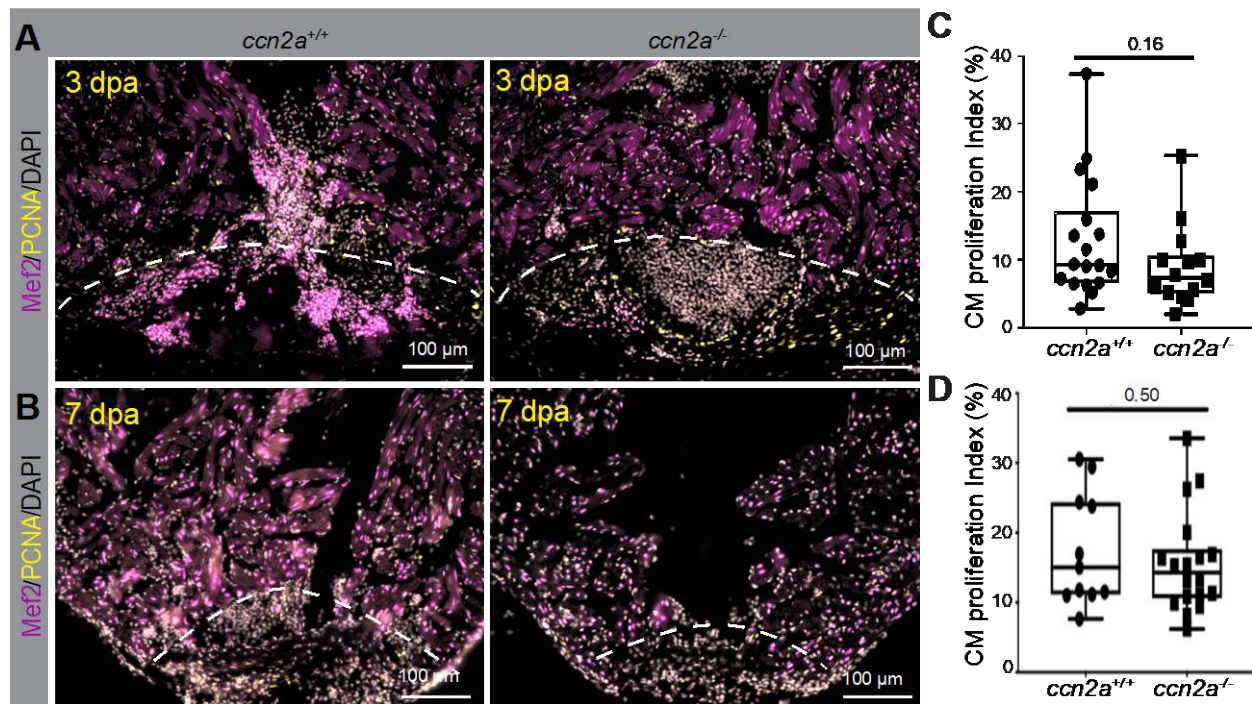

**Fig. S7: CM proliferation is not affected in *ccn2a* mutants in cardiac amputation model.** (A,B) Representative images of 10  $\mu$ m thick ventricular sagittal cryosections at 3 and 7 dpa, immunostained for Mef2 (magenta; marks CMs nuclei), PCNA (yellow; marks proliferating cells), and stained with DAPI (white; labels all nuclei). (C,D) Quantitative analysis of CM proliferation at 3 and 7 dpa (C and D, respectively). The graphs represent the ratio of Mef2<sup>+</sup>/PCNA<sup>+</sup> CMs to the total number of Mef2<sup>+</sup> CMs at the border zone (up to 100  $\mu$ m away from the injury edge). 18 wild-type, and 15 *ccn2a*<sup>-/-</sup> at 3 dpa and 11 wild type, and 17 *ccn2a*<sup>-/-</sup> hearts at 7 dpa were analyzed from two independent experiments. Statistical significance of the differences was evaluated by Mann–Whitney nonparametric tests (GraphPad Prism).

**Fig. S8**

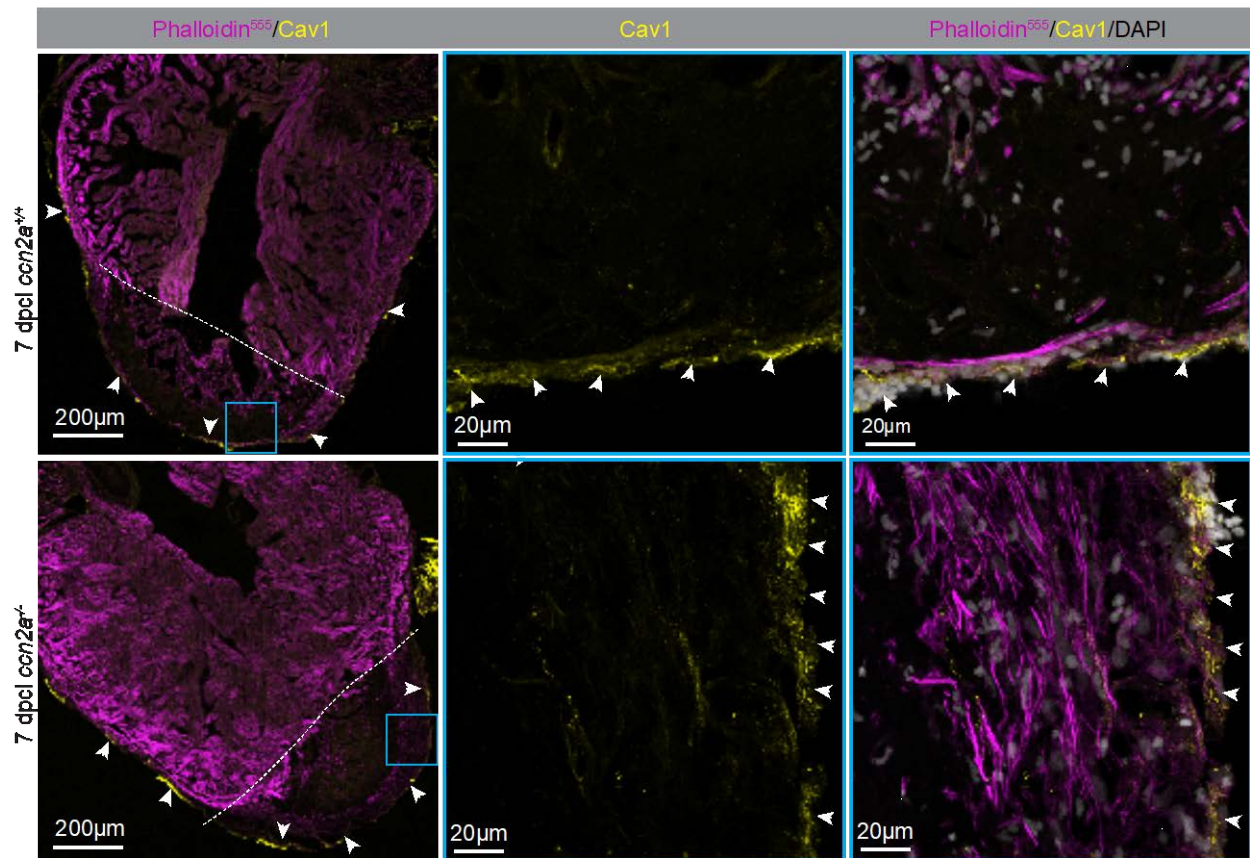

**Fig. S8: Epicardial cell migration is not affected in injured *ccn2a* mutant heart.** MIP of confocal images of sagittal cryosection of a 7 dpcl heart immunostained for Cav1 (yellow; marks epicardial cells), stained with phalloidin (magenta; marks F-actin), and DAPI (white; marks all nuclei). Panels in column 2 and 3 show high-magnification images of the boxed region in column 1. Arrowheads point to Cav1 positive epicardial cells. Dotted lines mark the injury edge.

**Fig. S9**

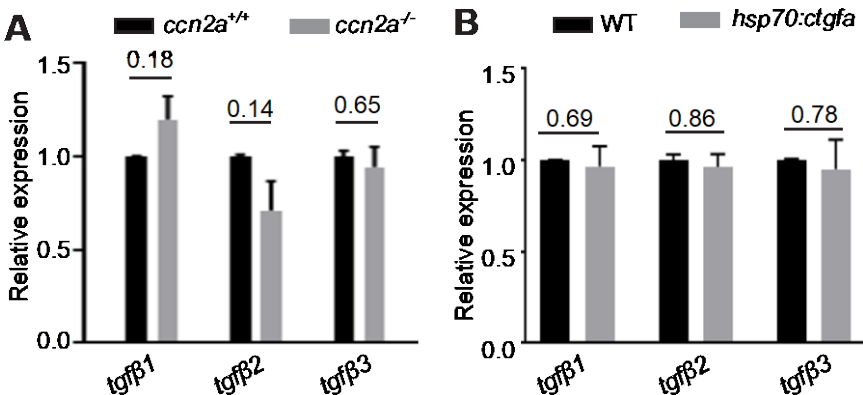

**Fig. S9: Ccn2a does not regulate expression of *tgfb* transcripts.** (A,B) A comparison of level of *tgfb* transcripts expression in wild-type and *ccn2a*<sup>-/-</sup> hearts (A), and in wild-type and *ccn2a* overexpressing (*hsp70:ctgfa*) hearts (B) at 4 dpci (n=3, each sample represents a pool of 6 hearts). The mean value for each gene in the control was set to 1. Error bars indicate the mean ± s.d. The statistical significance of differences was evaluated by a two-tailed Student's t-test (GraphPad Prism). ns ≥ 0.05. Mean Ct values for this Fig. are provided in Supplementary Table 4.

**Fig. S10**

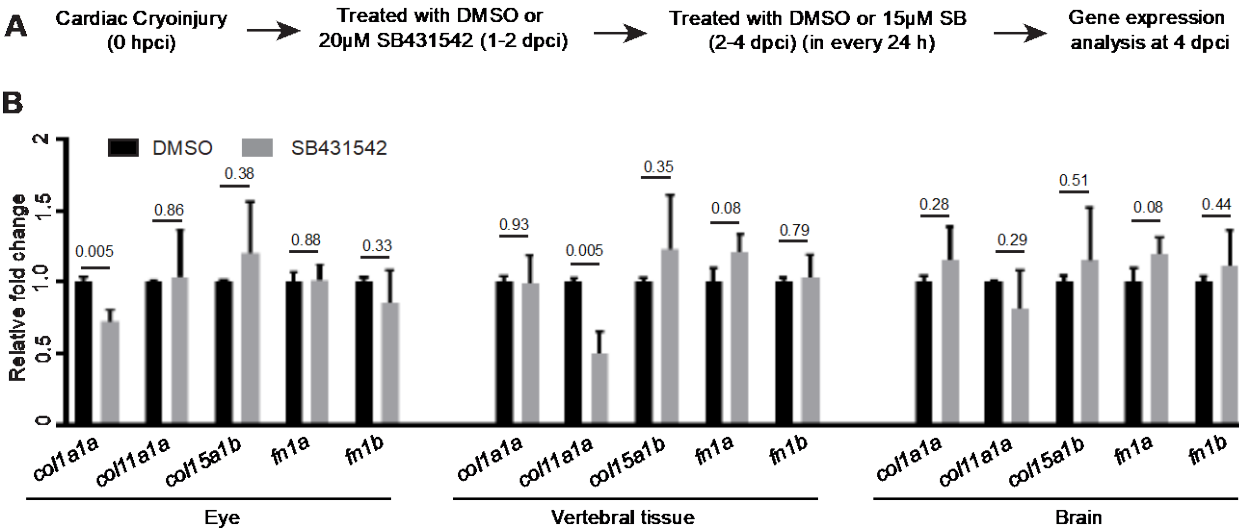

**Fig. S10: SB431542 treatment mostly does not affect collagen and fibronectin gene expression in non-cardiac healthy tissues.** (A) Schematic of the experimental procedures. (B) A comparison of level of collagen and fibronectin transcripts expression in DMSO or SB431542 treated animals at 4 dpci (n=3). The mean value for each gene in the control was set to 1. Error bars indicate the mean ± s.d.. The statistical significance of differences was evaluated by a two-tailed Student's t-test (GraphPad Prism).

## Supplementary Tables

**Table S1: List of secretory molecule encoding genes which were tested for differential expression between sham and 4 days cryo-injured cardiac ventricles.**

Corresponding gene accession number with fold changes are listed

| Sl# | Gene name                                               | Accession #                    | Mean fold change |
|-----|---------------------------------------------------------|--------------------------------|------------------|
| 1   | <i>paxillin a (pxna)</i>                                | NM_201588.1                    | 1.272212         |
| 2   | <i>paxillin b (pxnb)</i>                                | XM_021478354.1                 | 1.191006         |
| 3   | <i>periostin a (postna)</i>                             | XM_002663548.5                 | 4.150509         |
| 4   | <i>periostin b (postnb)</i>                             | NM_001077786.1                 | 4.780527         |
| 5   | <i>nephronectin (npnt)</i>                              | NM_001145580.1                 | 1.028286         |
| 6   | <i>fibrillin 2b (fbn2b)</i>                             | NM_001135790.1                 | 1.97104          |
| 7   | <i>fibulin 1 (fbln1)</i>                                | NM_131042.2                    | 1.348248         |
| 8   | <i>laminin alpha 1 (lama1)</i>                          | NM_001034986.1                 | 5.254547         |
| 9   | <i>laminin alpha 5 (lama5)</i>                          | NM_001039171.1                 | 2.852084         |
| 10  | <i>nidogen 1a (nid1a)</i>                               | XM_686064.8                    | 1.125959         |
| 11  | <i>nidogen 1b (nid1b)</i>                               | Gene ID: 562429<br>NR_023340.1 | 1.414458         |
| 12  | <i>cellular communication network factor 2a (ccn2a)</i> | NM_001015041.2                 | 3.775421         |
| 13  | <i>cellular communication network factor 2b (ccn2b)</i> | NM_001102573.1                 | 1.684559         |
| 14  | <i>secreted phosphoprotein 1 (spp1)</i>                 | NM_001002308.1                 | 13.99058         |
| 15  | <i>tenascin C (tnc)</i>                                 | NM_001312916.1                 | 2.507331         |
| 16  | <i>vitronectin a (vtna)</i>                             | NM_001020672.1                 | 0.718661         |
| 17  | <i>vitronectin b (vtnb)</i>                             | NM_001139461.1                 | 1.93415          |
| 18  | <i>collagen, type XI, alpha 2 (col11a2)</i>             | NM_001079992.2                 | 1.667507         |
| 19  | <i>vimentin (vim)</i>                                   | NM_131872.2                    | 1.047533         |

**Table S2: List of genes that are differentially expressed in injured *ccn2a*<sup>-/-</sup> hearts.**

Corresponding gene accession number, base mean value with log2 fold changes and P values are listed

| Sl. Nr. | Ensembl gene id     | Ensembl gene name     | UniProt proteins                                              | base Mean Wild-type 4dpci | base Mean <i>ctgfa</i> <sup>-/-</sup> 4dpci | log2FoldChange <i>ctgfa</i> <sup>-/-</sup> 4dpci /Wild-type 4dpci | P value  |
|---------|---------------------|-----------------------|---------------------------------------------------------------|---------------------------|---------------------------------------------|-------------------------------------------------------------------|----------|
| 1       | ENSDARG000000054753 | <i>coll10a1a</i>      | Collagen. type X. alpha 1a                                    | 509.0653338               | 2.6950739                                   | -7.108935024                                                      | 2.70E-06 |
| 2       | ENSDARG000000043396 | <i>fndc4a</i>         | Fibronectin type III domain-containing 4a                     | 128.9091458               | 0.777316967                                 | -6.191658198                                                      | 1.30E-14 |
| 3       | ENSDARG000000089362 | <i>grn1</i>           | Granulin 1,Zgc:136318 protein                                 | 3228.185894               | 208.6745437                                 | -3.944946874                                                      | 5.15E-14 |
| 4       | ENSDARG000000071662 | <i>si:rp71-36a1.3</i> | Si:rp71-36a1.3                                                | 650.1344933               | 81.45900754                                 | -2.981206564                                                      | 2.28E-06 |
| 5       | ENSDARG000000045453 | <i>f13a1a.1</i>       | Coagulation factor XIII. A1 polypeptide a. tandem duplicate 1 | 7685.820072               | 1146.738126                                 | -2.743593392                                                      | 2.11E-13 |
| 6       | ENSDARG000000090428 | <i>ctrb1</i>          | Chymotrypsinogen B1                                           | 352.6346127               | 61.74822359                                 | -2.494612966                                                      | 1.88E-07 |
| 7       | ENSDARG000000007358 | <i>cxcr3.1</i>        | Chemokine (C-X-C motif) receptor 3. tandem duplicate 1        | 113.2313003               | 423.4286932                                 | 1.893564177                                                       | 2.34E-06 |

Table S3: List of oligos used for quantitative RT-PCR analysis.

[Click here to Download Table S3](#)

Table S4 : Mean ct values of quantitative RT-PCR analyses.

[Click here to Download Table S4](#)
